# Supplementary material
Source: MDPI journal article supplement (https://www.mdpi.com/2306-5710/8/4/69)
Supplement: s1 [file s1]

*Supplementary Material*

# **Simultaneous Determination of Amino Acids and Biogenic Amines by Liquid Chromatography Coupled to Mass Spectrometry for Assessing Wine Quality**

**Ainhoa Navarro-Abril <sup>1</sup>, Javier Saurina <sup>1,2,\*</sup> and Sònia Sentellas <sup>1,2,3</sup>**

<sup>1</sup> Department of Chemical Engineering and Analytical Chemistry, Universitat de Barcelona, Martí i Franquès 1-11, E08028 Barcelona, Spain

<sup>2</sup> Research Institute in Food Nutrition and Food Safety, Universitat de Barcelona, Recinte Torribera, Av. Prat de la Riba 171, Edifici de Recerca (Gaudí), Santa Coloma de Gramenet, E08921 Barcelona, Spain

<sup>3</sup> Serra Hùnter Fellow, Generalitat de Catalunya, Rambla de Catalunya 19-21, E08007 Barcelona, Spain

\* Correspondence: xavi.saurina@ub.edu

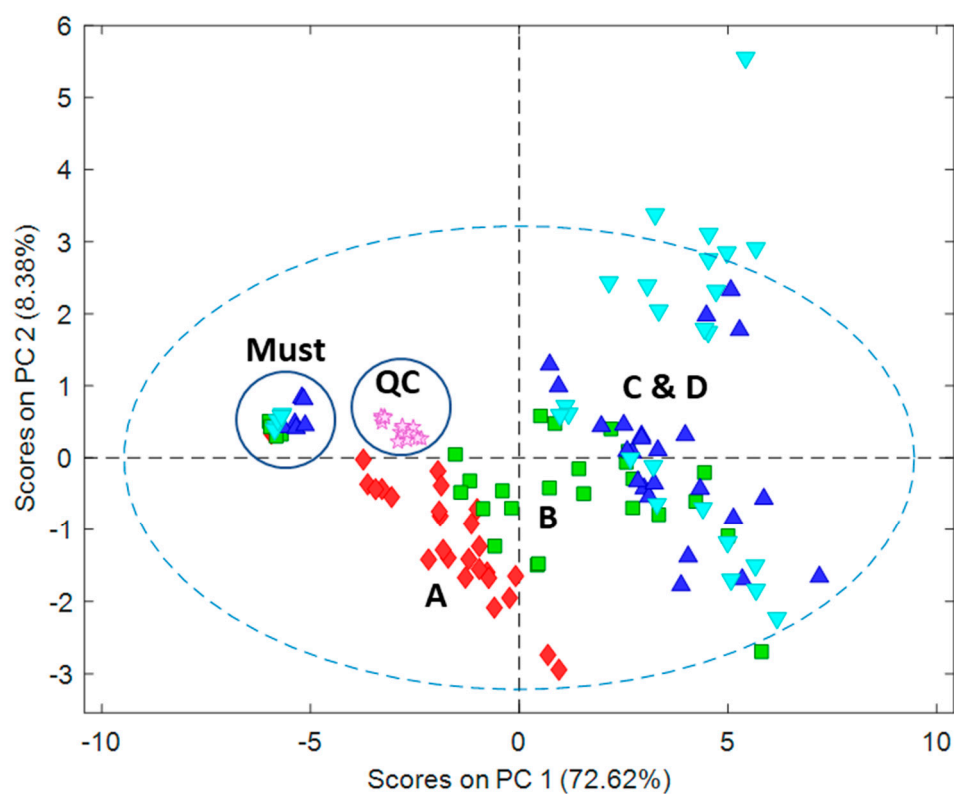

**Figure S1.** PCA score plot of PC1 vs. PC2 for the exploratory evaluation of samples using AA profiles as the data. Sample assignment: Star, QC; Rhombus, Quality A; Square, Quality B; Triangle (vertex up), Quality C; Triangle (vertex down), Quality D.

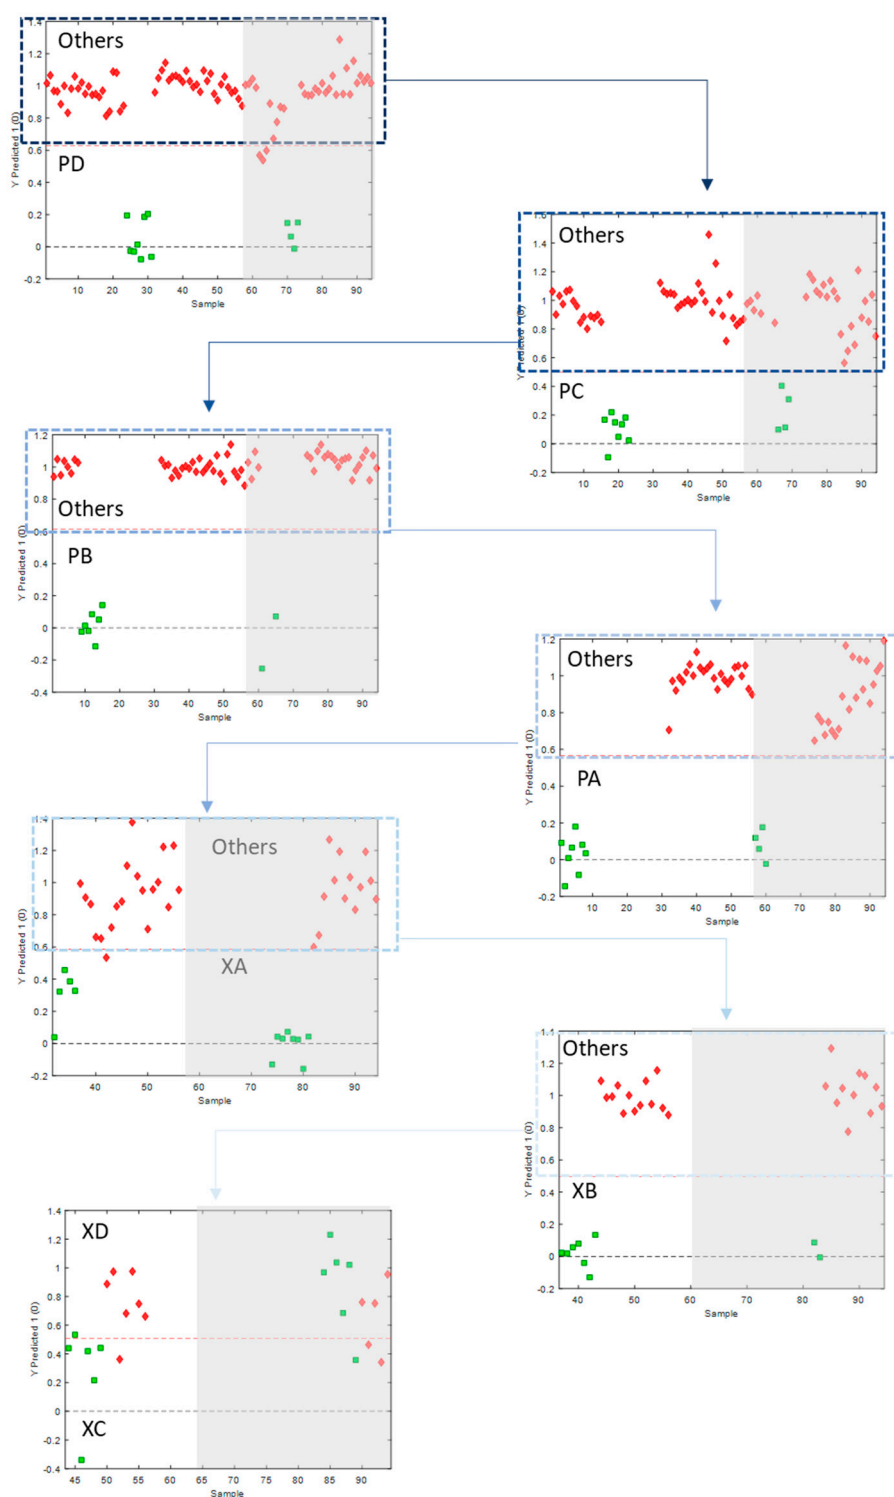

**Figure S2.** Two-class classification models obtained by PLS-DA according to the calibration tree shown in Figure 6. The calibration set comprises the 60% of all samples randomly chosen and the prediction set the 40% remaining samples.

**Table S1.** Parameters of the MS instruments for the set of analytes under study. DP, declustering potential; CE, collision energy, CXP, cell exit potential.

| Analyte          | Dansyl units | Q1 mass (Da) | Q3 mass (Da) | DP (V) | CE (V) | CXP (V) | Retention time (min) |
|------------------|--------------|--------------|--------------|--------|--------|---------|----------------------|
| Arginine         | 1            | 408          | 170          | 100    | 50     | 12      | 5.1                  |
| Asparagine       | 1            | 366          | 170          | 100    | 50     | 12      | 5.3                  |
| Glutamine        | 1            | 380          | 170          | 100    | 50     | 12      | 5.8                  |
| Serine           | 1            | 339          | 170          | 100    | 50     | 12      | 6.6                  |
| Agmatine         | 2            | 597          | 170          | 50     | 80     | 8       | 6.8                  |
| Glutamic acid    | 1            | 381          | 170          | 100    | 50     | 12      | 7.1                  |
| Aspartic acid    | 1            | 367          | 170          | 100    | 50     | 12      | 7.3                  |
| Hydroxyproline   | 1            | 365          | 170          | 100    | 50     | 12      | 7.3                  |
| Threonine        | 1            | 353          | 170          | 100    | 50     | 12      | 7.7                  |
| Ethanolamine     | 1            | 295          | 170          | 100    | 50     | 12      | 8.0                  |
| Glycine          | 1            | 309          | 170          | 100    | 50     | 12      | 8.6                  |
| Alanine          | 1            | 323          | 170          | 100    | 50     | 12      | 9.6                  |
| Proline          | 1            | 349          | 170          | 100    | 50     | 12      | 12.2                 |
| Valine           | 1            | 351          | 170          | 100    | 50     | 12      | 12.6                 |
| Methionine       | 1            | 383          | 170          | 100    | 50     | 12      | 12.7                 |
| Triptan          | 1            | 438          | 170          | 100    | 50     | 12      | 13.1                 |
| Ethylamine       | 1            | 279          | 170          | 100    | 50     | 12      | 13.7                 |
| Phenylalanine    | 1            | 399          | 170          | 100    | 50     | 12      | 14.1                 |
| Isoleucine       | 1            | 365          | 170          | 100    | 50     | 12      | 14.4                 |
| Leucine          | 1            | 365          | 170          | 100    | 50     | 12      | 14.6                 |
| Cysteine         | 1            | 355          | 170          | 90     | 30     | 10      | 15.1                 |
| Ornithine        | 2            | 599          | 170          | 100    | 50     | 12      | 16.5                 |
| Lysine           | 2            | 613          | 170          | 100    | 50     | 12      | 17.2                 |
| Histidine        | 2            | 622          | 170          | 100    | 50     | 12      | 17.5                 |
| Tryptamine       | 1            | 394          | 234          | 60     | 40     | 10      | 17.7                 |
| Phenylethylamine | 1            | 355          | 170          | 90     | 30     | 10      | 18.8                 |
| Putrescine       | 2            | 555          | 234          | 120    | 60     | 12      | 19.6                 |
| Cadaverine       | 2            | 569          | 234          | 100    | 50     | 12      | 20.5                 |
| Tyrosine         | 2            | 648          | 170          | 100    | 50     | 12      | 20.5                 |
| Histamine        | 2            | 578          | 234          | 100    | 50     | 12      | 20.9                 |
| Hexylamine       | 1            | 335          | 157          | 86     | 39     | 12      | 21.3                 |
| Octopamine       | 2            | 620          | 170          | 66     | 59     | 12      | 21.6                 |
| Tyramine         | 1            | 604          | 234          | 100    | 50     | 12      | 23.8                 |
| Spermidine       | 3            | 845          | 360          | 40     | 80     | 12      | 24.3                 |
| Spermine         | 4            | 1135         | 360          | 90     | 50     | 12      | 27.3                 |

Taula S2. Figures of merit of the proposed HPLC-MS/MS method.

| Compound         | Linear range (mg L <sup>-1</sup> ) | Sensitivity (counts per min) | R <sup>2</sup> | Repeatability (Retention time) RSD% | Repeatability at 0.2 mg L <sup>-1</sup> (peak area) RSD% | Repeatability at 2 mg L <sup>-1</sup> (peak area) RSD% | LOD (mg L <sup>-1</sup> ) |
|------------------|------------------------------------|------------------------------|----------------|-------------------------------------|----------------------------------------------------------|--------------------------------------------------------|---------------------------|
| Arginine         | 0.1 - 4                            | 2.80 × 10 <sup>5</sup>       | 0.9944         | 0.17                                | 4.39                                                     | 8.52                                                   | 0.05                      |
| Asparagine       | 0.1 - 5                            | 3.08 × 10 <sup>4</sup>       | 0.9979         | 0.15                                | 1.21                                                     | 7.73                                                   | 0.07                      |
| Glutamine        | 0.1 - 5                            | 9.92 × 10 <sup>4</sup>       | 0.9906         | 0.13                                | 8.89                                                     | 8.57                                                   | 0.05                      |
| Serine           | 0.2 - 5                            | 3.28 × 10 <sup>4</sup>       | 0.9909         | 0.14                                | 8.89                                                     | 8.04                                                   | 0.16                      |
| Agmatine         | 0.1 - 0.5                          | 1.14 × 10 <sup>6</sup>       | 0.9932         | 0.29                                | 2.67                                                     | 7.85                                                   | 0.05                      |
| Glutamic acid    | 0.1 - 5                            | 3.51 × 10 <sup>5</sup>       | 0.9968         | 0.35                                | 4.84                                                     | 5.03                                                   | 0.04                      |
| Aspartic acid    | 0.1 - 5                            | 1.15 × 10 <sup>5</sup>       | 0.9974         | 0.35                                | 4.58                                                     | 6.57                                                   | 0.08                      |
| Hydroxyproline   | 0.2 - 5                            | 2.88 × 10 <sup>5</sup>       | 0.9903         | 0.16                                | 8.23                                                     | 7.80                                                   | 0.06                      |
| Threonine        | 0.1 - 2                            | 4.88 × 10 <sup>4</sup>       | 0.9989         | 0.12                                | 8.27                                                     | 8.18                                                   | 0.08                      |
| Ethanolamine     | 0.1 - 2                            | 7.07 × 10 <sup>4</sup>       | 0.9980         | 0.13                                | 7.93                                                     | 9.25                                                   | 0.05                      |
| Glycine          | 0.1 - 4                            | 9.66 × 10 <sup>4</sup>       | 0.9983         | 0.10                                | 6.42                                                     | 5.02                                                   | 0.11                      |
| Alanine          | 0.1 - 2                            | 1.46 × 10 <sup>5</sup>       | 0.9991         | 0.11                                | 7.53                                                     | 6.73                                                   | 0.06                      |
| Proline          | 0.5 - 10                           | 3.32 × 10 <sup>5</sup>       | 0.9984         | 0.07                                | 8.92                                                     | 7.29                                                   | 0.09                      |
| Valine           | 0.2 - 10                           | 3.11 × 10 <sup>5</sup>       | 0.9979         | 0.06                                | 5.34                                                     | 7.04                                                   | 0.05                      |
| Methionine       | 0.2 - 10                           | 2.82 × 10 <sup>5</sup>       | 0.9979         | 0.04                                | 1.24                                                     | 8.26                                                   | 0.01                      |
| Tryptophan       | 0.05 - 10                          | 1.01 × 10 <sup>6</sup>       | 0.9976         | 0.12                                | 5.36                                                     | 6.44                                                   | 0.05                      |
| Ethylamine       | 0.1 - 5                            | 5.54 × 10 <sup>5</sup>       | 0.9977         | 0.06                                | 6.72                                                     | 4.95                                                   | 0.05                      |
| Phenylalanine    | 0.2 - 5                            | 4.85 × 10 <sup>5</sup>       | 0.9990         | 0.06                                | 8.88                                                     | 3.14                                                   | 0.07                      |
| Isoleucine       | 0.2 - 5                            | 6.06 × 10 <sup>5</sup>       | 0.9941         | 0.04                                | 2.40                                                     | 4.35                                                   | 0.02                      |
| Leucine          | 0.1 - 5                            | 5.54 × 10 <sup>5</sup>       | 0.9977         | 0.06                                | 6.72                                                     | 4.95                                                   | 0.05                      |
| Cysteine         | 0.05 - 10                          | 6.93 × 10 <sup>5</sup>       | 0.9982         | 0.06                                | 2.42                                                     | 2.66                                                   | 0.02                      |
| Ornithine        | 0.5 - 5                            | 7.87 × 10 <sup>5</sup>       | 0.9978         | 0.08                                | 2.71                                                     | 8.51                                                   | 0.21                      |
| Lysine           | 0.2 - 10                           | 6.80 × 10 <sup>5</sup>       | 0.9996         | 0.08                                | 3.21                                                     | 9.02                                                   | 0.10                      |
| Histidine        | 0.5 - 5                            | 1.21 × 10 <sup>6</sup>       | 0.9991         | 0.10                                | 2.97                                                     | 7.20                                                   | 0.15                      |
| Tryptamine       | 0.05 - 10                          | 6.03 × 10 <sup>4</sup>       | 0.9987         | 0.07                                | 2.70                                                     | 6.16                                                   | 0.04                      |
| Phenylethylamine | 0.2 - 4                            | 6.11 × 10 <sup>5</sup>       | 0.9990         | 0.04                                | 8.48                                                     | 5.30                                                   | 0.13                      |
| Putrescine       | 0.1 - 2                            | 5.53 × 10 <sup>4</sup>       | 0.9961         | 0.04                                | 5.73                                                     | 8.68                                                   | 0.03                      |
| Cadaverine       | 0.2 - 2                            | 1.93 × 10 <sup>5</sup>       | 0.9992         | 0.03                                | 4.68                                                     | 7.14                                                   | 0.04                      |
| Tyrosine         | 0.05 - 10                          | 4.07 × 10 <sup>5</sup>       | 0.9985         | 0.12                                | 4.20                                                     | 8.70                                                   | 0.04                      |
| Histamine        | 0.1 - 2                            | 1.60 × 10 <sup>5</sup>       | 0.9957         | 0.03                                | 8.54                                                     | 9.14                                                   | 0.06                      |
| Octopamine       | 0.05 - 10                          | 7.62 × 10 <sup>5</sup>       | 0.9991         | 0.06                                | 2.54                                                     | 4.83                                                   | 0.03                      |
| Tyramine         | 0.1 - 2                            | 2.96 × 10 <sup>5</sup>       | 0.9914         | 0.02                                | 7.83                                                     | 6.94                                                   | 0.07                      |
| Spermidine       | 0.5 - 2                            | 5.08 × 10 <sup>5</sup>       | 0.9993         | 0.05                                | 4.92                                                     | 3.66                                                   | 0.14                      |
| Spermine         | 0.5 - 5                            | 1.66 × 10 <sup>4</sup>       | 0.9961         | 0.04                                | n.d.                                                     | 4.43                                                   | 0.40                      |
